# Supplementary material for: Substitution reaction of triphenylphosphine oxide with rare-earth metal phosphido methyl complexes
Source: Royal Society of Chemistry journal article supplement (doi:10.1039/c5nj00335k), 2015-01-01
Supplement: c5nj00335k1.pdf [file c5nj00335k1.pdf]

*For New Journal of Chemistry*

*Supporting Information*

**Substitution reaction of triphenylphosphine oxide with rare-earth  
metal phosphido methyl complexes**

Yingdong Lv, Jiliang Zhou, Xuebing Leng and Yaofeng Chen\*

State Key Laboratory of Organometallic Chemistry, Shanghai Institute of Organic Chemistry,  
Chinese Academy of Sciences, 345 Lingling Road, Shanghai 200032, People's Republic of China

Contents

|                                                                                               |    |
|-----------------------------------------------------------------------------------------------|----|
| 1. Crystallographic data and refinement for <b>1</b> , <b>3</b> , <b>7</b> and <b>8</b> ..... | S1 |
| 2. Molecular structure of <b>3</b> .....                                                      | S2 |

**Table S1** Crystallographic Data and Refinement for **1**, **3**, **7** and **8**.

| Complex                                      | <b>1</b>                                           | <b>3</b>                                           |
|----------------------------------------------|----------------------------------------------------|----------------------------------------------------|
| Empirical formula                            | C <sub>40</sub> H <sub>67</sub> N <sub>3</sub> PSc | C <sub>30</sub> H <sub>47</sub> N <sub>3</sub> PSc |
| Formula weight                               | 665.90                                             | 525.63                                             |
| Colour                                       | orange                                             | orange                                             |
| Crystal system                               | Orthorhombic                                       | monoclinic                                         |
| Space group                                  | Pbca                                               | P2(1)/n                                            |
| <i>a</i> /Å                                  | 13.925(2)                                          | 10.710(2)                                          |
| <i>b</i> /Å                                  | 22.628(3)                                          | 13.537(2)                                          |
| <i>c</i> /Å                                  | 25.869(4)                                          | 20.887(3)                                          |
| $\alpha$ /°                                  | 90.00                                              | 90.00                                              |
| $\beta$ /°                                   | 90.00                                              | 93.806(3)                                          |
| $\gamma$ /°                                  | 90.00                                              | 90.00                                              |
| Volume/Å <sup>3</sup>                        | 8151(2)                                            | 3021(1)                                            |
| Z                                            | 8                                                  | 4                                                  |
| Density (calculated)/g cm <sup>-3</sup>      | 1.085                                              | 1.156                                              |
| F(000)                                       | 2912                                               | 1136                                               |
| T(K)                                         | 143(2)                                             | 133(2)                                             |
| $\theta$ range/°                             | 1.57 to 27.56                                      | 1.79 to 27.00                                      |
| Reflections collected                        | 62632                                              | 18804                                              |
| Unique reflections                           | 9402                                               | 6540                                               |
| Unique reflections<br>[I > 2 $\sigma$ (I)]   | 5419                                               | 4411                                               |
| Parameters                                   | 428                                                | 327                                                |
| Goodness of fit                              | 1.020                                              | 1.041                                              |
| Final R indices<br>[I > 2 $\sigma$ (I)]      | 0.0569, 0.1285                                     | 0.0728, 0.1917                                     |
| $\Delta\rho_{\max, \min}$ / eÅ <sup>-3</sup> | 0.629, -0.550                                      | 2.048, -0.607                                      |

| Complex                                      | 7                                                   | 8                                                     |
|----------------------------------------------|-----------------------------------------------------|-------------------------------------------------------|
| Empirical formula                            | C <sub>40</sub> H <sub>51</sub> N <sub>3</sub> OPLu | C <sub>40</sub> H <sub>52</sub> N <sub>3</sub> OPClSc |
| Formula weight                               | 795.78                                              | 702.22                                                |
| Colour                                       | yellow                                              | yellow                                                |
| Crystal system                               | monoclinic                                          | monoclinic                                            |
| Space group                                  | P2(1)/n                                             | P2(1)/n                                               |
| <i>a</i> /Å                                  | 9.591(1)                                            | 27.730(4)                                             |
| <i>b</i> /Å                                  | 23.000(2)                                           | 9.843(2)                                              |
| <i>c</i> /Å                                  | 17.017(2)                                           | 27.805(4)                                             |
| $\alpha$ /°                                  | 90.00                                               | 90.00                                                 |
| $\beta$ /°                                   | 97.618(2)                                           | 92.963(3)                                             |
| $\gamma$ /°                                  | 90.00                                               | 90.00                                                 |
| Volume/Å <sup>3</sup>                        | 3720.8(5)                                           | 7579(2)                                               |
| Z                                            | 4                                                   | 8                                                     |
| Density (calculated)/g<br>cm <sup>-3</sup>   | 1.421                                               | 1.231                                                 |
| F(000)                                       | 1624                                                | 2992                                                  |
| T(K)                                         | 143(2)                                              | 140(2)                                                |
| $\theta$ range/°                             | 1.50 to 30.03                                       | 1.06 to 25.10                                         |
| Reflections collected                        | 34993                                               | 48937                                                 |
| Unique reflections                           | 10798                                               | 13486                                                 |
| Unique reflections<br>[I > 2 $\sigma$ (I)]   | 7776                                                | 8022                                                  |
| Parameters                                   | 423                                                 | 846                                                   |
| Goodness of fit                              | 0.984                                               | 0.947                                                 |
| Final R indices<br>[I > 2 $\sigma$ (I)]      | 0.0371, 0.0693                                      | 0.0769, 0.2140                                        |
| $\Delta\rho_{\max, \min}$ / eÅ <sup>-3</sup> | 1.911, -0.740                                       | 1.826, -0.627                                         |

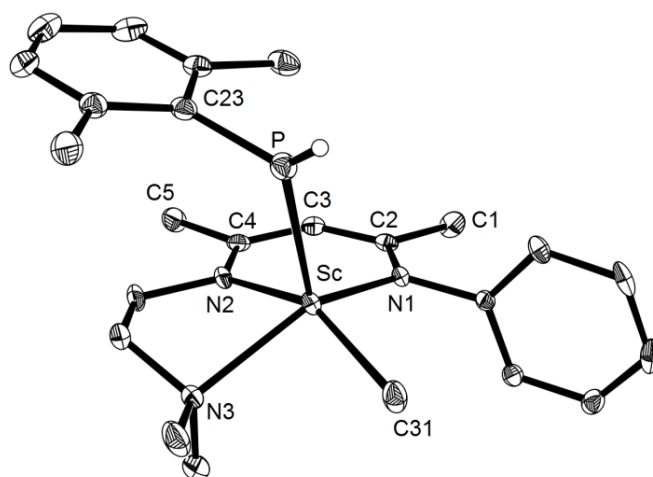

**Fig. S1** Molecular structure of **3** with thermal ellipsoids set at 30% probability. Isopropyl groups on the arene and all H-atoms (except the phosphido hydrogen atom) are omitted for clarity. Selected bond lengths (Å) and angles (°): Sc–N1 2.169(3), Sc–N2 2.200(3), Sc–N3 2.328(3), Sc–P 2.664(1), Sc–C 1.839(4), C2–N1 1.352(5), C4–N2 1.326(5), C2–C3 1.391(6), C3–C4 1.411(5), N1–Sc–N2 83.54(12) P–Sc–C22 99.91(13), Sc–P–C23 106.47(13).
